# Supplementary material
Source: PubMed Central journal article supplement (PMC6640757)
Supplement: ao6b00010_si_001.pdf [file ao6b00010_si_001.pdf]

**Supporting Information**

**Humic acid as sensitizer in highly stable dye solar  
cell : Energy from abundant natural polymer soil  
component**

**Rohit L. Vekariya,<sup>a,b</sup> Keval K. Sonigara,<sup>a</sup> Kishan B. Fadadu,<sup>a</sup> Jayraj V. Vaghasiya,<sup>a</sup>  
Saurabh S. Soni<sup>a,\*</sup>**

*<sup>a</sup>Department of Chemistry, Sardar Patel University, Vallabh Vidyanagar- 388 120, Gujarat,  
INDIA*

*<sup>b</sup>School of Chemical Engineering, Fuzhou University, FUZHOU-350116, Fujian Province, P. R.  
CHINA*

\* Author to whom all correspondence should address (E-mail: [soni\\_b21@yahoo.co.in](mailto:soni_b21@yahoo.co.in))

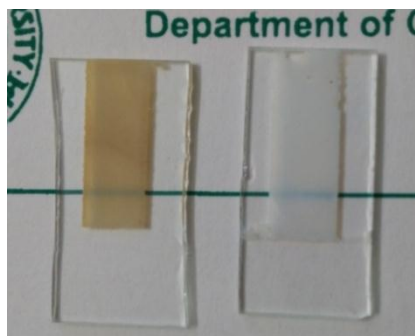

**Figure S1.** TiO<sub>2</sub> photoanode with and without HA

***Dye adsorption - desorption study:***

A stock solution of 0.4 % (w/v) HA was prepared in DMSO:DMF and diluted to 0.16 % (w/v) for dye adsorption on FTO/TiO<sub>2</sub> electrode having area 1.0 cm<sup>2</sup>. Dye bath containing FTO/TiO<sub>2</sub> was kept at 40 °C for 48 hrs and sensitized photoanode was washed thoroughly with DMSO:DMF solvent mixture followed by drying.

For desorption process, pre-sensitized FTO/TiO<sub>2</sub> electrode was kept in 0.001M aqueous NaOH solution for 24 hrs. Amount of dye loading was determined by measuring absorbance in UV-Vis spectra (**Figure S2**) before and after desorption using calibration curve method. Calculation shows that, 0.02% (w/v) of HA was adsorbed on 1 cm<sup>2</sup> titania electrode from 0.16% (w/v) HA solution.

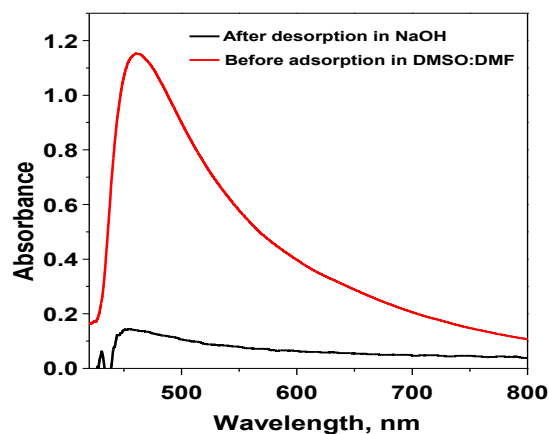

**Figure S2.** UV-Vis spectra of HA solutions

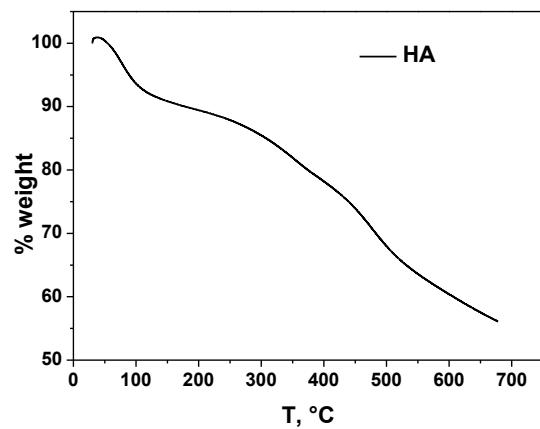

**Figure S3.** TGA characteristic of HA
